# Supplementary material
Source: PubMed Central journal article supplement (PMC3253999)

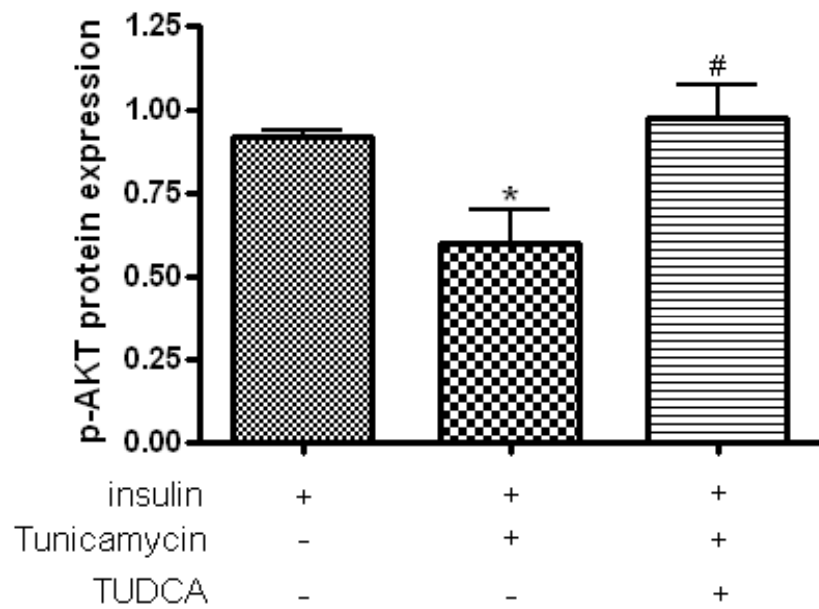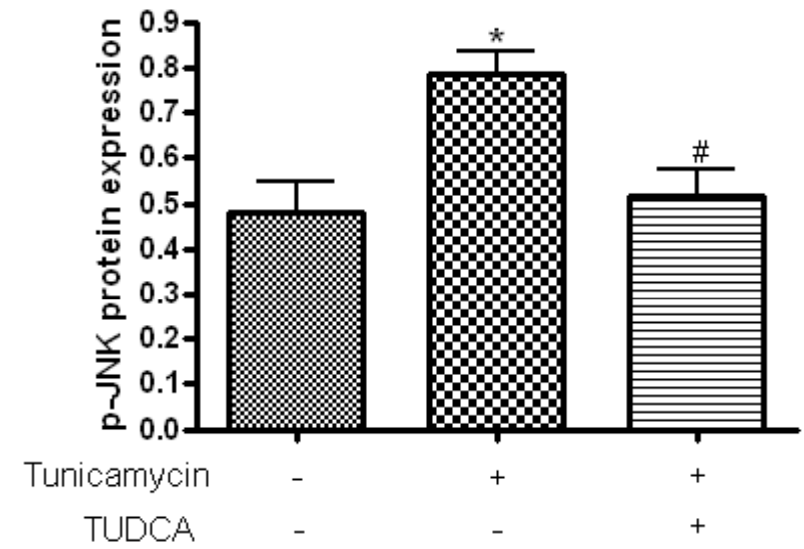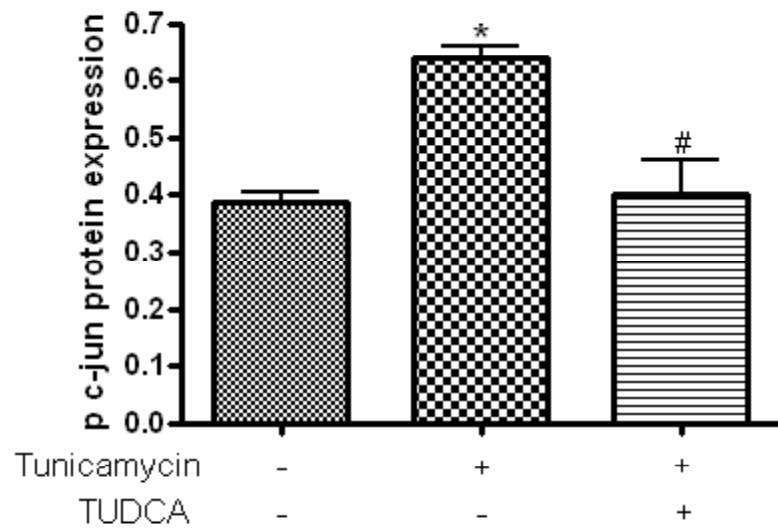

Online Figure 1

Supplement: NIHMS161199-supplement-supp1.pdf [file NIHMS161199-supplement-supp1.pdf]
